# Supplementary material
Source: Springer Nature journal article supplement (https://www.springermedizin.de/resource/supplementary/10194_2014_1028_MOESM5_ESM.pdf/9423406)

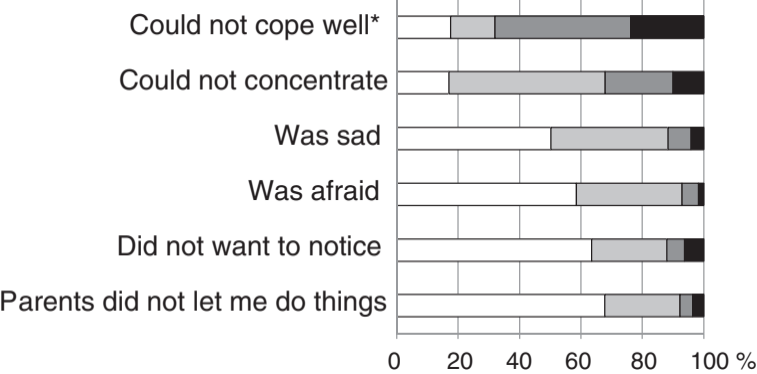

Supplement: MOESM5 [file 9423406]
